# Supplementary material for: 2H-SnS2 assembled with petaloid 1T@2H-MoS2 nanosheet heterostructures for room temperature NO2 gas sensing
Source: RSC Adv. 2024 Aug 1;14(33):24130–40. doi: 10.1039/d4ra03194f (PMC11293367; doi:10.1039/d4ra03194f)
Supplement: RA-014-D4RA03194F-s001 [file RA-014-D4RA03194F-s001.pdf]

## Supplementary Information

### 2H-SnS<sub>2</sub> assembled with petaloid 1T@2H-MoS<sub>2</sub> nanosheets heterostructures for room temperature NO<sub>2</sub> gas sensing

Shraddha Hambir<sup>a,c</sup>, Shashikant Shinde<sup>b</sup>, H. M. Pathan<sup>a</sup>, Som Datta Kaushik<sup>c</sup>, Chandra Sekhar Rout<sup>d</sup> Shweta Jagtap<sup>e\*</sup>

<sup>a</sup>Department of Physics, Savitribai Phule Pune University, India

<sup>b</sup>MES's Department of Physics, Nowrosjee Wadia College, Pune 411001, India

<sup>c</sup>UGC-DAE Consortium for Scientific Research Mumbai Centre, BARC, Mumbai, India

<sup>d</sup>Centre for Nano and Material Sciences, Jain (Deemed-to-be University), Jain Global Campus, Ramanagaram, Bangalore, India

<sup>e</sup>Department of Electronic and Instrumentation Science, Savitribai Phule Pune University, India

Corresponding author: - [\\*shweta.jagtap@gmail.com](mailto:shweta.jagtap@gmail.com)

## 2. Experimental

### 2.4 Gas sensor fabrication and gas sensing measurement

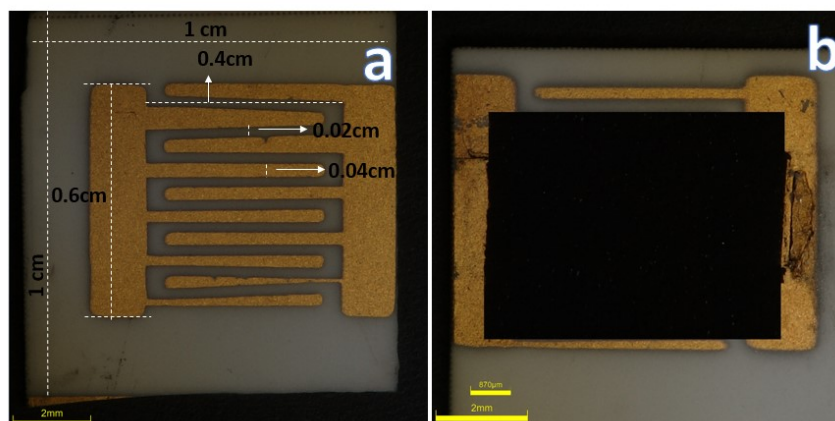

Figure S1. Optical images of Sensing device a) bare electrode, b) with material deposition

### X-ray Diffraction

Figure S1 shows diffraction peaks at 15.92°, 29.12°, 33.03°, 47.48°, 50.62°, and 53.34°, which correspond to the (001), (100), (101), (102), (110), and (111) planes of 2T-type hexagonal berndtite SnS<sub>2</sub> (JCPDS, No. 23-0677)<sup>1</sup>

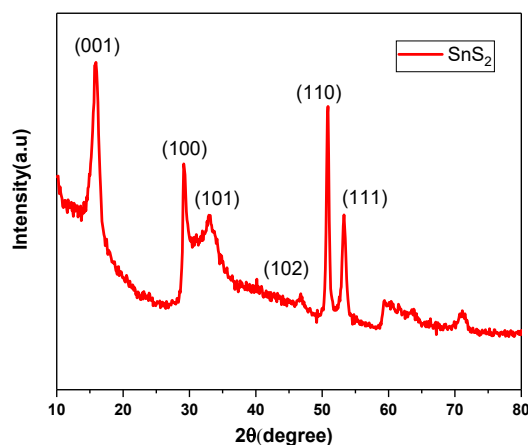

Figure S2. XRD pattern of SnS<sub>2</sub>

### Raman analysis –

The presence of 2H-SnS<sub>2</sub> was confirmed using non-destructive Raman spectroscopy in figure S2. Both 2H-SnS<sub>2</sub> and 4H-SnS<sub>2</sub> nanosheets exhibit a characteristic peak around 315 cm<sup>-1</sup>. SnS<sub>2</sub> samples display an intense peak at approximately 313 cm<sup>-1</sup>, attributed to the A<sub>1g</sub> mode, which involves the out-of-plane stretching of sulfur atoms in SnS<sub>2</sub>. Additionally, for the 4H-SnS<sub>2</sub> crystal, two weak E-mode peaks are observed at 200 cm<sup>-1</sup> and 214 cm<sup>-1</sup>. In contrast, the 2H-SnS<sub>2</sub> crystal features a weak E<sub>g</sub> mode at 205 cm<sup>-1</sup>, which differentiates it from the 4H-SnS<sub>2</sub>. The presence of several additional modes in the Raman spectrum of 4H-SnS<sub>2</sub> further supports the confirmation of the 2H polytype SnS<sub>2</sub> formation<sup>2-4</sup>.

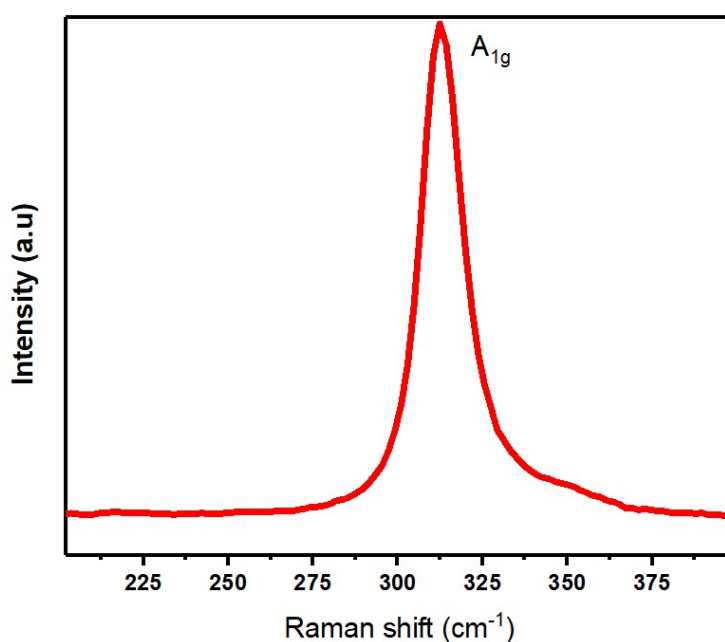

**Figure S3.** Raman spectra of 2H-SnS<sub>2</sub>

**FESEM**

The FESEM image of pristine SnS<sub>2</sub> in figure S4 showed highly agglomerated nanoparticles they are densely packed and compact.

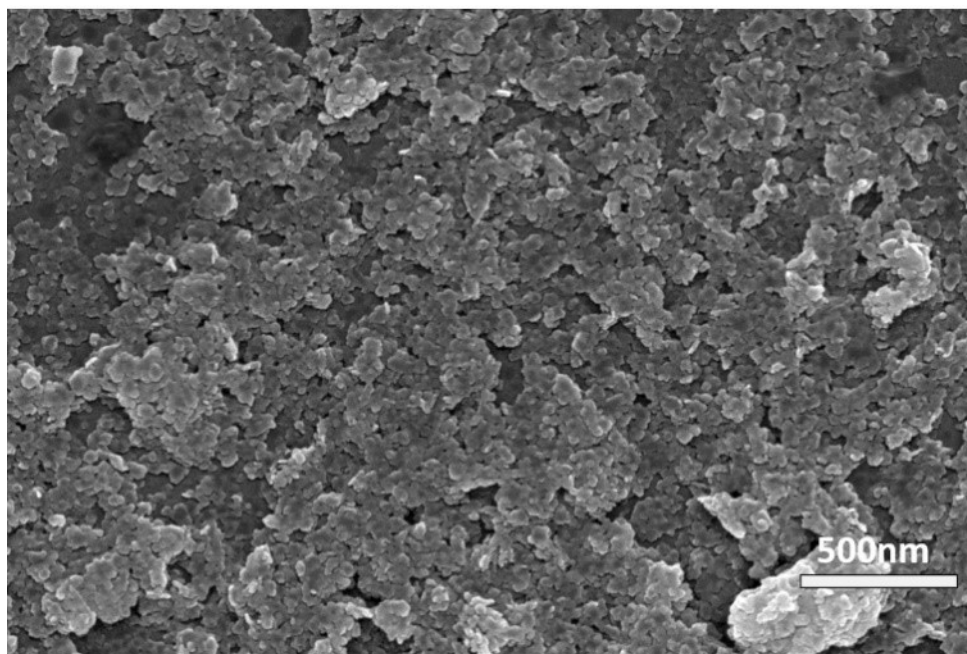

**Figure S4.** FESEM images of pure SnS<sub>2</sub>

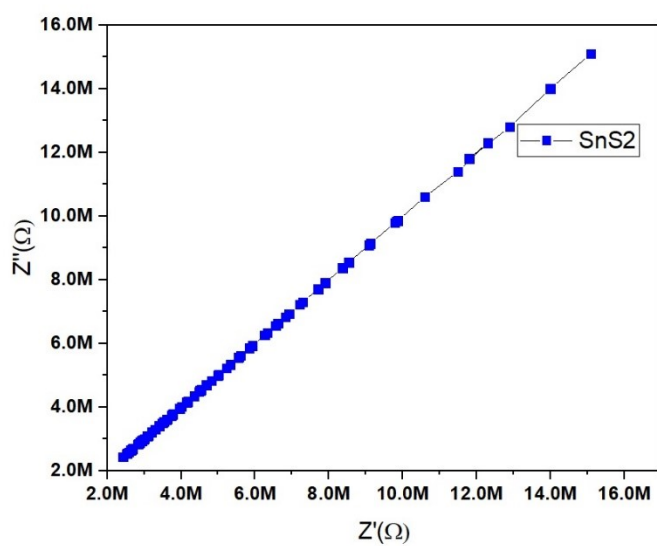

**Figure S5.** EIS spectra of SnS<sub>2</sub>

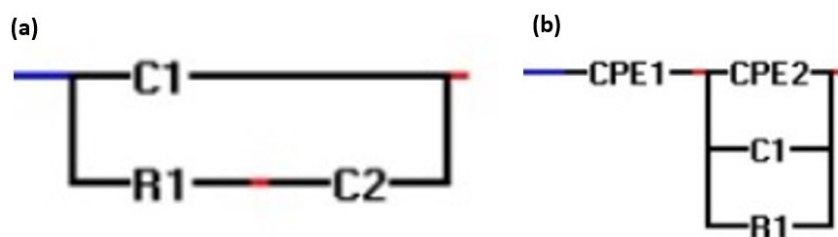

**Figure S6.** Equivalent Circuit for a) 1T@2H-MoS<sub>2</sub> and 1T@2H-MoS<sub>2</sub>/SnS<sub>2</sub> and b) SnS<sub>2</sub>

### References:

- 1 Z. Zhang, J. Huang, M. Zhang, Q. Yuan and B. Dong, *Appl Catal B*, 2015, **163**, 298–305.
- 2 Y. Huang, E. Sutter, J. T. Sadowski, M. Cotlet, O. L. A. Monti, D. A. Racke, M. R. Neupane, D. Wickramaratne, R. K. Lake, B. A. Parkinson and P. Sutter, *ACS Nano*, 2014, **8**, 10743–10755.
- 3 T. Sriv, K. Kim and H. Cheong, 2018, **8**, 10194.
- 4 L. Wang, X. Li, C. Pei, C. Wei, J. Dai, ... X. H.-C. C. and undefined 2022, *ElsevierL Wang, X Li, C Pei, C Wei, J Dai, X Huang, H LiChinese Chemical Letters, 2022•Elsevier.*
